# Supplementary material
Source: PubMed Central journal article supplement (PMC3692315)
Supplement: hdy20135x2.pdf [file hdy20135x2.pdf]

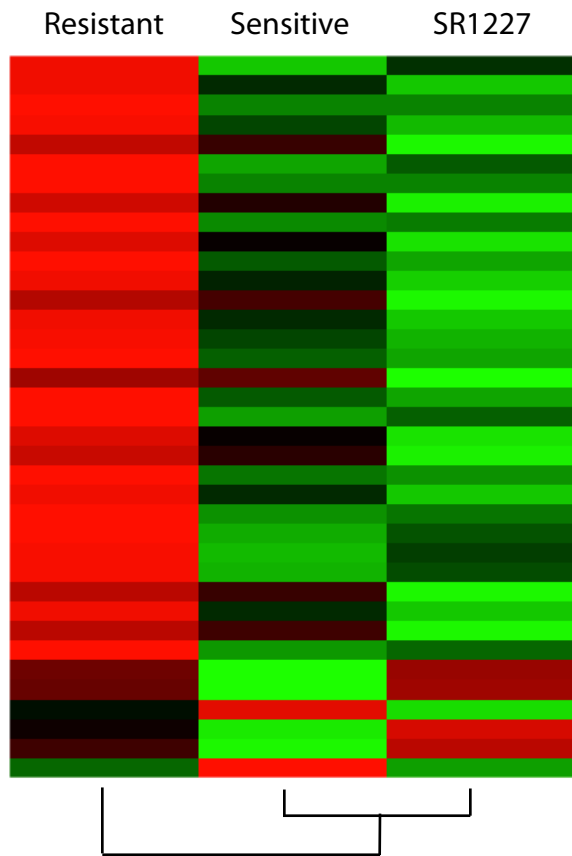

Supplementary Figure S3. Reproduction of Figure 4a with color coding. Red denotes lower expression level normalized to 1 in each line (gene). Green denotes higher expression level.
