# Supplementary material
Source: PubMed Central journal article supplement (PMC3692315)

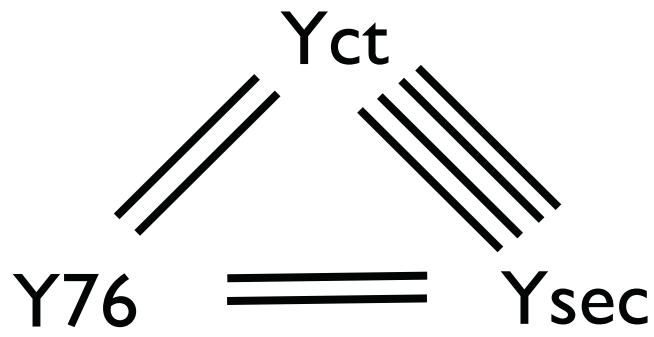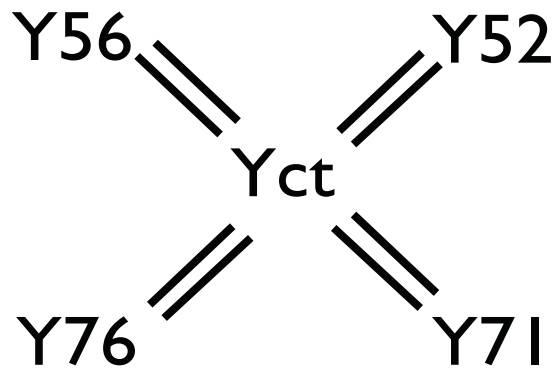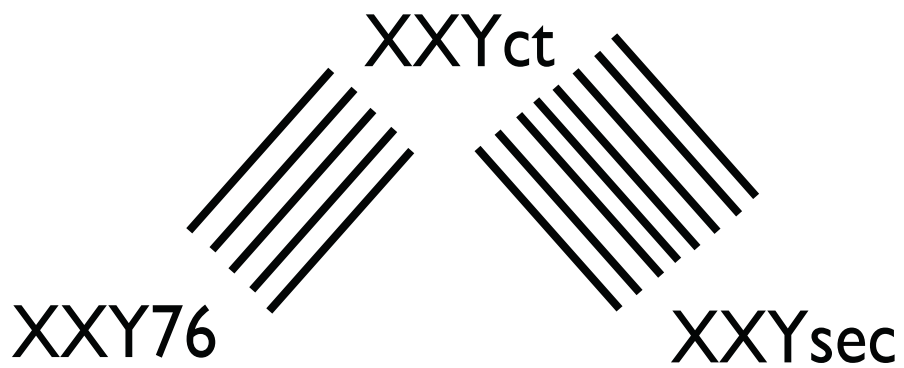

Supplement: hdy20135x1.pdf [file hdy20135x1.pdf]
